# Supplementary material for: Multiscale modeling reveals inhibitory and stimulatory effects of caffeine on acetaminophen‐induced toxicity in humans
Source: PubMed Central journal article supplement — CPT Pharmacometrics Syst Pharmacol. 2017 Jan 28;6(2):136–46. doi: 10.1002/psp4.12153 (PMC5321810; doi:10.1002/psp4.12153), 2017-01-28
Supplement: PSP4-6-136-s002.pdf [file PSP4-6-136-s002.pdf]

## SUPPLEMENTARY METHODS

### Analysis of in vitro toxicity data

The analysis of time-series gene expression profiles from Open TG-GATEs (1) (ArrayExpress accession numbers: E-MTAB-798) including data pre-processing and normalization, differential expression analysis of single genes and overrepresentation analysis of key cellular processes were performed as explained before (2). Fold change values were calculated to indicate gene expression changes compared to time-matched controls. To represent key cellular processes, seventy-four hand-curated toxicity lists were extracted from QIAGENs Ingenuity Pathway Analysis (IPA®, QIAGEN Redwood City, [www.qiagen.com/ingenuity](http://www.qiagen.com/ingenuity)). Since primary human hepatocytes were analyzed (1), key cellular processes representing cardiac or renal toxicity were not considered. Genes with unknown functions were also not taken into account.

### PBPK model development

PBPK models of APAP and CAF were built by use of the software PK-Sim® (version 6.0) and MoBi® (version 3.4) (Bayer Technology Services, GmbH, Leverkusen, Germany) (3,4), which are freely available for academic use (Supplementary Figure S1). Physicochemical drug properties of APAP, CAF and their metabolites were therefore obtained from the literature (Supplementary Table S1). Reference PBPK models were first developed and assessed by comparing simulated drug concentrations with clinical PK data from literature (5–9) (Supplementary Figure S2). Intestinal permeability values originally provided by PK-Sim® were slightly adjusted for APAP ( $1.9E-05$  cm/min) and CAF ( $3E-05$  cm/min) (Supplementary Figure S2). The standard distribution model of PK-Sim® was used to calculate partition coefficients and cellular permeabilities (3). The Michaelis-Menten constants ( $K_m$ ) and the maximal velocities ( $v_{max}$ ) representing the kinetic behavior of active transport processes and metabolizing reactions were either taken from literature (10–16) or were fitted to best describe the experimental data (Supplementary Table S2). Relative abundance of relevant ADME enzymes and transporters (Supplementary Table S2) was estimated by using tissue-specific gene expression data (Supplementary Table S3) (17). Kidney plasma clearances were parametrized such that urinary excretion rates were in accordance with results observed in human clinical studies (18–20) (Supplementary Table S4). A competitive inhibition of CAF on CYP2E1 (13,21) and ABCB1 (19) with dissociation constants ( $K_i$ ) of  $48.5$   $\mu\text{mol/l}$  and  $0.06$   $\mu\text{mol/l}$ , respectively, were modelled to consider the PK interaction of CAF on APAP (8,22). Respective reaction rates in the competitive inhibition processes were calculated as follows:

$$v = \frac{v_{\max} * S}{K_m * (1 + I/K_i) + S} \quad (1)$$

$v$  = reaction rate,  $v_{\max}$  = maximal reaction rate,  $S$  = free substrate (APAP) concentration,  $I$  = free inhibitor (CAF) concentration,  $K_m$  = Michaelis-Menten constant in absence of the inhibitor.

The established reference PBPK models were further validated by using clinical PK data not used for model establishment (20,22–25) (Supplementary Figure S2) thereby leaving all model parameters unchanged, except parameters characterizing the specific design of the clinical studies (Supplementary Table S5). The model quality was evaluated by calculating normalized root-mean-square deviation (RMSD), coefficient of determination ( $R^2$ ) values (2), and by comparing observed vs. predicted area under the curve values (AUCs) and maximal concentrations ( $c_{\max}$ ) of the different simulations.

### **Other system biology models for APAP**

Several system biology models of APAP were published in literature and applied for different purposes such as toxicology (26–29) or pediatric scaling (30) (Supplementary Table S6). Here, a subset of five different models (26–30) is briefly explored (Supplementary Table S6) thereby focusing on (i) the underlying model structure including the modeling framework and the implemented biochemical processes, (ii) the clinical data used for model development and validation, and (iii) the modeling purpose & results. All models consider clearance processes of APAP and its metabolites, while Jiang et al. (30) and Ben-Shachar et al. (29) additionally considers several UGT and CYP enzymes for the metabolism of APAP (Supplementary Table S6). In our model active drug transport processes by ABCB1 and ABCG2 were additionally considered.

## REFERENCES

1. Igarashi Y, Nakatsu N, Yamashita T, Ono A, Ohno Y, Urushidani T, et al. Open TG-GATEs: a large-scale toxicogenomics database. *Nucleic Acids Res.* 2015 Jan 13;43(Database issue):D921-7.
2. Thiel C, Cordes H, Conde I, Castell JV, Blank LM, Kuepfer L. Model-based contextualization of in vitro toxicity data quantitatively predicts in vivo drug response in patients. *Arch Toxicol.* 2016 May 9;
3. Willmann S, Lippert J, Sevestre M, Solodenko J, Fois F, Schmitt W. PK-Sim®: a physiologically based pharmacokinetic “whole-body” model. *Biosilico.* 2003 Sep;1(4):121-4.
4. Kuepfer L, Niederalt C, Wendl T, Schlender J, Willmann S, Lippert J, et al. Applied Concepts in PBPK modeling: How to build a PBPK/PD model. *CPT Pharmacometrics Syst Pharmacol.* 2016 Sep;
5. Lelo A, Birkett DJ, Robson RA, Miners JO. Comparative pharmacokinetics of caffeine and its primary demethylated metabolites paraxanthine, theobromine and theophylline in man. *Br J Clin Pharmacol.* 1986 Aug;22(2):177-82.
6. Blanchard J, Sawers SJ. Comparative pharmacokinetics of caffeine in young and elderly men. *J Pharmacokinet Biopharm.* 1983 Apr;11(2):109-26.
7. Kaplan GB, Greenblatt DJ, Ehrenberg BL, Goddard JE, Cotreau MM, Harmatz JS, et al. Dose-Dependent Pharmacokinetics and Psychomotor Effects of Caffeine in Humans. *J Clin Pharmacol.* 1997;37(8):693-703.
8. Renner B, Clarke G, Grattan T, Beisel A, Mueller C, Werner U, et al. Caffeine accelerates absorption and enhances the analgesic effect of acetaminophen. *J Clin Pharmacol.* 2007;47(6):715-26.
9. Shinoda S, Aoyama T, Aoyama Y, Tomioka S, Matsumoto Y, Ohe Y. Pharmacokinetics/pharmacodynamics of acetaminophen analgesia in Japanese patients with chronic pain. *Biol Pharm Bull.* 2007 Jan;30(1):157-61.
10. Chen W, Koenigs LL, Thompson SJ, Peter RM, Rettie AE, Trager WF, et al. Oxidation of acetaminophen to its toxic quinone imine and nontoxic catechol metabolites by baculovirus-expressed and purified human cytochromes P450 2E1 and 2A6. *Chem Res Toxicol.* 1998;11(4):295-301.
11. Ha HR, Chen J, Freiburghaus AU, Follath F. Metabolism of theophylline by cDNA-expressed human cytochromes P-450. *Br J Clin Pharmacol.* 1995;39(3):321-6.
12. Gates S, Miners JO. Cytochrome P450 isoform selectivity in human hepatic theobromine metabolism. *Br J Clin Pharmacol.* 1999;47(3):299-305.
13. Gu L, Gonzalez FJ, Kalow W, Tang BK. Biotransformation of caffeine, paraxanthine, theobromine and theophylline by cDNA-expressed human CYP1A2 and CYP2E1.

- Pharmacogenetics. 1992 Apr;2(2):73–7.
14. Labeledzki A, Buters J, Jabrane W, Fuhr U. Differences in caffeine and paraxanthine metabolism between human and murine CYP1A2. *Biochem Pharmacol.* 2002 Jun 15;63(12):2159–67.
  15. Mutlib AE, Goosen TC, Bauman JN, Williams JA, Kulkarni S, Kostrubsky S. Kinetics of acetaminophen glucuronidation by UDP-glucuronosyltransferases 1A1, 1A6, 1A9 and 2B15. Potential implications in acetaminophen-induced hepatotoxicity. *Chem Res Toxicol.* 2006;19(5):701–9.
  16. Adjei AA, Gaedigk A, Simon SD, Weinshilboum RM, Leeder JS. Interindividual variability in acetaminophen sulfation by human fetal liver: implications for pharmacogenetic investigations of drug-induced birth defects. *Birth Defects Res A Clin Mol Teratol.* 2008 Mar;82(3):155–65.
  17. Meyer M, Schneckener S, Ludewig B, Kuepfer L, Lippert J. Using expression data for quantification of active processes in physiologically based pharmacokinetic modeling. *Drug Metab Dispos.* 2012 May;40(5):892–901.
  18. Critchley J a, Nimmo GR, Gregson C a, Woolhouse NM, Prescott LF. Inter-subject and ethnic differences in paracetamol metabolism. *Br J Clin Pharmacol.* 1986;22(6):649–57.
  19. Wishart DS, Knox C, Guo AC, Shrivastava S, Hassanali M, Stothard P, et al. DrugBank: a comprehensive resource for in silico drug discovery and exploration. *Nucleic Acids Res.* 2006 Jan 1;34(Database issue):D668–72.
  20. Tang-Liu DD, Williams RL, Riegelman S. Disposition of caffeine and its metabolites in man. *J Pharmacol Exp Ther.* 1983 Jan;224(1):180–5.
  21. Nouchi T, Lasker JM, Lieber CS. Activation of acetaminophen oxidation in rat liver microsomes by caffeine. *Toxicol Lett.* 1986;32(1–2):1–8.
  22. Iqbal N, Ahmad B, Janbaz KH, Gilani A-UH, Niazi SK. The effect of caffeine on the pharmacokinetics of acetaminophen in man. *Biopharm Drug Dispos.* 1995 Aug;16(6):481–7.
  23. Newton R, Broughton LJ, Lind MJ, Morrison PJ, Rogers HJ, Bradbrook ID. Plasma and salivary pharmacokinetics of caffeine in man. *Eur J Clin Pharmacol.* 1981;21(1):45–52.
  24. Rawlins MD, Henderson DB, Hijab AR. Pharmacokinetics of paracetamol (acetaminophen) after intravenous and oral administration. *Eur J Clin Pharmacol.* 1977 Apr 20;11(4):283–6.
  25. Prescott LF. Kinetics and metabolism of paracetamol and phenacetin. *Br J Clin Pharmacol.* 1980 Oct;10 Suppl 2(S2):291S–298S.
  26. Woodhead JL, Howell BA, Yang Y, Harrill AH, Iii HJC, Andersen ME, et al. An

- Analysis of N -Acetylcysteine Treatment for Acetaminophen Overdose Using a Systems Model of Drug-Induced Liver Injury □. 2012;
27. Krauss M, Schaller S, Borchers S, Findeisen R, Lippert J, Kuepfer L. Integrating Cellular Metabolism into a Multiscale Whole-Body Model. Papin JA, editor. PLoS Comput Biol. 2012 Oct 25;8(10):e1002750.
  28. Howell BA, Yang Y, Kumar R, Andersen ME, Siler SQ, Watkins PB. In vitro to in vivo extrapolation and species response comparisons for drug-induced liver injury ( DILI ) using DILIsym TM : a mechanistic , mathematical model of DILI. 2012;527–41.
  29. Ben-Shachar R, Chen Y, Luo S, Hartman C, Reed M, Nijhout HF. The biochemistry of acetaminophen hepatotoxicity and rescue: a mathematical model. Theor Biol Med Model. 2012;9:55.
  30. Jiang X-L, Zhao P, Barrett JS, Lesko LJ, Schmidt S. Application of physiologically based pharmacokinetic modeling to predict acetaminophen metabolism and pharmacokinetics in children. CPT pharmacometrics Syst Pharmacol. 2013;2(August):e80.
