# Supplementary material for: Multiscale modeling reveals inhibitory and stimulatory effects of caffeine on acetaminophen‐induced toxicity in humans
Source: PubMed Central journal article supplement — CPT Pharmacometrics Syst Pharmacol. 2017 Jan 28;6(2):136–46. doi: 10.1002/psp4.12153 (PMC5321810; doi:10.1002/psp4.12153), 2017-01-28
Supplement: PSP4-6-136-s007.pdf [file PSP4-6-136-s007.pdf]

**Supplementary Table S1. Physicochemical properties used in the developed PBPK models.**

Molecular weight (MW), octanol/water partition coefficient (logP), fraction unbound (Fu), acid dissociation constant (pKa), and water solubility used in the developed PBPK models of APAP and CAF. MWs, logP values and water solubilities are taken from DrugBank (1) and Human Metabolome Database (2). In some cases, logP and Fu values were slightly adjusted to best describe the experimental PK data.

| Drug / Metabolite | MW<br>[g/mol] | logP   | Water solubility<br>[mg/l] | Fu   | Ref. | Compound type | pKa            | Ref. |
|-------------------|---------------|--------|----------------------------|------|------|---------------|----------------|------|
| APAP              | 151.16        | 0.46   | 14000.00                   | 0.81 | (1)  | Acid          | 9.38           | (1)  |
| APAPC             | 254.31        | 0.33   | 337.00                     | 0.60 | *    | [Acid, base]  | [1.93, 9.09]   | (1)  |
| APAPG             | 327.29        | -1.04  | 27700.00                   | 0.98 | *    | Acid          | 3.18           | (1)  |
| APAPS             | 231.23        | -0.372 | 1540.00                    | 0.80 | *    | [Acid, base]  | [-2.16, 14.65] | (3)  |
| NAPQI             | 149.15        | 0.01   | 987.00                     | 0.02 | (4)  | Neutral       | -              | (3)  |
| CAF               | 194.20        | -0.07  | 21600.00                   | 0.65 | (5)  | Base          | 10.40          | (1)  |
| PX                | 180.16        | -0.63  | 9130.00                    | 0.52 | (5)  | Acid          | 10.76          | (2)  |
| TB                | 180.16        | -0.78  | 9740.00                    | 0.86 | (5)  | Acid          | 9.28           | (2)  |
| TP                | 180.16        | -0.02  | 22900.00                   | 0.58 | (5)  | Acid          | 7.82           | (2)  |

\* adjusted from parent drug

## REFERENCES

1. Wishart DS, Knox C, Guo AC, Shrivastava S, Hassanali M, Stothard P, et al. DrugBank: a comprehensive resource for in silico drug discovery and exploration. *Nucleic Acids Res.* 2006 Jan 1;34(Database issue):D668–72.
2. Wishart DS, Tzur D, Knox C, Eisner R, Guo AC, Young N, et al. HMDB: the Human Metabolome Database. *Nucleic Acids Res.* 2007 Jan;35(Database issue):D521-6.
3. Swain M. chemicalize.org chemicalize.org by ChemAxon Ltd. *J Chem Inf Model.* 2012 Feb 27;52(2):613–5.
4. Bond GR. Acetaminophen protein adducts: A review. *Clin Toxicol.* 2009 Jan 3;47(1):2–7.
5. Lelo A, Birkett DJ, Robson RA, Miners JO. Comparative pharmacokinetics of caffeine and its primary demethylated metabolites paraxanthine, theobromine and theophylline in man. *Br J Clin Pharmacol.* 1986 Aug;22(2):177–82.
