# Supplementary material for: Multiscale modeling reveals inhibitory and stimulatory effects of caffeine on acetaminophen‐induced toxicity in humans
Source: PubMed Central journal article supplement — CPT Pharmacometrics Syst Pharmacol. 2017 Jan 28;6(2):136–46. doi: 10.1002/psp4.12153 (PMC5321810; doi:10.1002/psp4.12153), 2017-01-28
Supplement: PSP4-6-136-s008.pdf [file PSP4-6-136-s008.pdf]

**Supplementary Table S2. Active drug transport and metabolic reactions.**

Metabolic and active drug transport processes, which were considered in the PBPK models of APAP and CAF, either consist of the metabolic enzyme and the corresponding metabolite, or of the transporter and the corresponding transporter type (efflux is defined as transport of a substance from the intracellular space to the interstitial space or the lumen). Kinetic parameters  $K_m$  and  $v_{max}$  were used to characterize the kinetic behavior of active processes.

| <b>Drug / Metabolite</b> | <b>Metabolite / Transporter type</b> | <b>Metabolic enzyme / Transporter</b> | <b><math>K_m</math><br/>[<math>\mu\text{mol/l}</math>]</b> | <b><math>V_{max}^*</math><br/>[<math>\mu\text{mol/l/min}</math>]</b> | <b>Ref.</b> |
|--------------------------|--------------------------------------|---------------------------------------|------------------------------------------------------------|----------------------------------------------------------------------|-------------|
| APAP                     | APAPG                                | UGT1A9                                | 9200.00                                                    | 1078.88                                                              | (1)         |
| APAP                     | APAPS                                | SULT1A1                               | 2400.00                                                    | 51.00                                                                | (2,3)       |
| APAP                     | NAPQI                                | CYP2E1                                | 1300.00                                                    | 51.02                                                                | (4,5)       |
| APAP                     | Efflux                               | ABCB1                                 | 20308.50*                                                  | 1220.00                                                              | (6,7)       |
| APAPG                    | Efflux                               | ABCG2                                 | 96.33*                                                     | 24.51                                                                | (6)         |
| APAPS                    | Efflux                               | ABCG2                                 | 94.49*                                                     | 1200.00                                                              | (6)         |
| NAPQI                    | APAPC                                | GSTT1                                 | 25.00*                                                     | 20.16                                                                | (5)         |
| CAF                      | PX                                   | CYP1A2                                | 400.00                                                     | 19.00                                                                | (8)         |
| CAF                      | TB                                   | CYP1A2                                | 280.00                                                     | 4.80                                                                 | (8)         |
| CAF                      | TP                                   | CYP2E1                                | 2800.00                                                    | 9.00                                                                 | (8)         |
| PX                       | 1X                                   | CYP1A2                                | 2500.00                                                    | 260.00                                                               | (9)         |
| TB                       | 7X                                   | CYP1A2                                | 4200.00                                                    | 280.00                                                               | (10)        |
| TP                       | 13U                                  | CYP2E1                                | 15300.00                                                   | 350.00                                                               | (11)        |

\* Estimated

## REFERENCES

1. Mutlib AE, Goosen TC, Bauman JN, Williams JA, Kulkarni S, Kostrubsky S. Kinetics of acetaminophen glucuronidation by UDP-glucuronosyltransferases 1A1, 1A6, 1A9 and 2B15. Potential implications in acetaminophen-induced hepatotoxicity. *Chem Res Toxicol.* 2006;19(5):701–9.
2. Riches Z, Bloomer JC, Coughtrie MWH. Comparison of 2-aminophenol and 4-nitrophenol as in vitro probe substrates for the major human hepatic sulfotransferase, SULT1A1, demonstrates improved selectivity with 2-aminophenol. *Biochem Pharmacol.* 2007;74(2):352–8.
3. Adjei AA, Gaedigk A, Simon SD, Weinshilboum RM, Leeder JS. Interindividual variability in acetaminophen sulfation by human fetal liver: implications for pharmacogenetic investigations of drug-induced birth defects. *Birth Defects Res A Clin Mol Teratol.* 2008 Mar;82(3):155–65.
4. Chen W, Koenigs LL, Thompson SJ, Peter RM, Rettie AE, Trager WF, et al. Oxidation of acetaminophen to its toxic quinone imine and nontoxic catechol metabolites by baculovirus-expressed and purified human cytochromes P450 2E1 and 2A6. *Chem Res Toxicol.* 1998;11(4):295–301.
5. Shinoda S, Aoyama T, Aoyama Y, Tomioka S, Matsumoto Y, Ohe Y. Pharmacokinetics/pharmacodynamics of acetaminophen analgesia in Japanese patients with chronic pain. *Biol Pharm Bull.* 2007 Jan;30(1):157–61.
6. Mazaleuskaya LL, Sangkuhl K, Thorn CF, FitzGerald GA, Altman RB, Klein TE. PharmGKB summary: pathways of acetaminophen metabolism at the therapeutic versus toxic doses. *Pharmacogenet Genomics.* 2015 Aug;25(8):416–26.
7. Wishart DS, Knox C, Guo AC, Shrivastava S, Hassanali M, Stothard P, et al. DrugBank: a comprehensive resource for in silico drug discovery and exploration. *Nucleic Acids Res.* 2006 Jan 1;34(Database issue):D668–72.
8. Gu L, Gonzalez FJ, Kalow W, Tang BK. Biotransformation of caffeine, paraxanthine, theobromine and theophylline by cDNA-expressed human CYP1A2 and CYP2E1. *Pharmacogenetics.* 1992 Apr;2(2):73–7.
9. Labeledzki A, Buters J, Jabrane W, Fuhr U. Differences in caffeine and paraxanthine metabolism between human and murine CYP1A2. *Biochem Pharmacol.* 2002 Jun 15;63(12):2159–67.
10. Gates S, Miners JO. Cytochrome P450 isoform selectivity in human hepatic theobromine metabolism. *Br J Clin Pharmacol.* 1999;47(3):299–305.
11. Ha HR, Chen J, Freiburghaus AU, Follath F. Metabolism of theophylline by cDNA-expressed human cytochromes P-450. *Br J Clin Pharmacol.* 1995;39(3):321–6.
