# Supplementary material for: Multiscale modeling reveals inhibitory and stimulatory effects of caffeine on acetaminophen‐induced toxicity in humans
Source: PubMed Central journal article supplement — CPT Pharmacometrics Syst Pharmacol. 2017 Jan 28;6(2):136–46. doi: 10.1002/psp4.12153 (PMC5321810; doi:10.1002/psp4.12153), 2017-01-28
Supplement: PSP4-6-136-s009.pdf [file PSP4-6-136-s009.pdf]

**Supplementary Table S3. Relative expression values of relevant enzymes and transporters.**

Relative expression values for the vascular system, as well as all organs and tissues used to estimate relative abundance of relevant ADME enzymes and transporters, which are involved in metabolism and elimination processes of APAP and CAF.

|                             | ABCB1 | ABCG2    | CYP1A2   | CYP2E1   | GSTT1    | SULT1A1 | UGT1A9   |
|-----------------------------|-------|----------|----------|----------|----------|---------|----------|
| <b>Plasma</b>               | 0     | 0        | 0        | 0        | 0.02     | 0.14    | 0        |
| <b>Vascular Endothelium</b> | 0     | 0        | 0        | 0        | 0        | 0       | 0        |
| <b>Blood Cells</b>          | 0     | 0        | 0        | 0        | 0.02     | 0.14    | 0        |
| <b>Bone</b>                 | 0.09  | 0.21     | 0        | 0        | 8.18E-03 | 0.05    | 0        |
| <b>Brain</b>                | 0.31  | 0.46     | 0        | 6.97E-04 | 0.09     | 0.06    | 0        |
| <b>Fat</b>                  | 0     | 0        | 0        | 0        | 0        | 0       | 0        |
| <b>Gonads</b>               | 0.19  | 0.27     | 2.96E-04 | 1.11E-03 | 0.04     | 0.1     | 1.62E-04 |
| <b>Heart</b>                | 0.17  | 0.11     | 0        | 0        | 0.33     | 0.09    | 0        |
| <b>Kidney</b>               | 0.66  | 0.09     | 4.40E-06 | 4.24E-04 | 0.06     | 0.06    | 1        |
| <b>Liver</b>                | 0.28  | 0.28     | 1        | 1        | 0.21     | 1       | 0.1      |
| <b>Lung</b>                 | 0.14  | 0.22     | 2.49E-05 | 6.38E-04 | 0.06     | 0.13    | 0        |
| <b>Muscle</b>               | 0.06  | 0.03     | 0        | 0        | 1        | 0.07    | 0        |
| <b>Pancreas</b>             | 0.1   | 5.43E-03 | 0        | 0        | 9.49E-03 | 0.04    | 0        |
| <b>Skin</b>                 | 0.11  | 0        | 0        | 0        | 0        | 0       | 0        |
| <b>Spleen</b>               | 0.21  | 0.06     | 0        | 0        | 0.06     | 0.12    | 0        |
| <b>Duodenum</b>             | 1     | 1        | 0        | 8.12E-03 | 0.15     | 0.3     | 4.13E-03 |
| <b>Jejunum</b>              | 1     | 1        | 0        | 8.12E-03 | 0.15     | 0.3     | 4.13E-03 |
| <b>Ileum</b>                | 1     | 1        | 0        | 8.12E-03 | 0.15     | 0.3     | 4.13E-03 |
| <b>Cecum</b>                | 0     | 0        | 0        | 0        | 0        | 0       | 0        |
| <b>Colon</b>                | 0.45  | 0.16     | 0        | 0        | 0.14     | 0.22    | 7.95E-03 |
| <b>Rectum</b>               | 0     | 0        | 0        | 0        | 0        | 0       | 0        |
| <b>Stomach</b>              | 0.14  | 0.04     | 0        | 0        | 0.07     | 0.05    | 1.73E-03 |
| <b>Small Intestine</b>      | 1     | 1        | 0        | 8.12E-03 | 0.15     | 0.3     | 4.13E-03 |
| <b>Large Intestine</b>      | 0.45  | 0.16     | 0        | 0        | 0.14     | 0.22    | 7.95E-03 |
