# Supplementary material for: Multiscale modeling reveals inhibitory and stimulatory effects of caffeine on acetaminophen‐induced toxicity in humans
Source: PubMed Central journal article supplement — CPT Pharmacometrics Syst Pharmacol. 2017 Jan 28;6(2):136–46. doi: 10.1002/psp4.12153 (PMC5321810; doi:10.1002/psp4.12153), 2017-01-28
Supplement: PSP4-6-136-s010.pdf [file PSP4-6-136-s010.pdf]

**Supplementary Table S4. Elimination processes.**

Renal clearance processes considered in the developed PBPK models of APAP and CAF. Kidney plasma clearances were parameterized in order to match experimental observations.

| <b>Drug / Metabolite</b> | <b>Plasma clearance<br/>[l/min/kg]</b> | <b>Ref.</b>       |
|--------------------------|----------------------------------------|-------------------|
| APAP                     | 1.27E-04                               | (1,2)             |
| APAPC                    | 4.38E-04                               | (1)               |
| APAPG                    | 1.19E-03                               | (1)               |
| APAPS                    | 4.56E-03                               | (1)               |
| NAPQI                    | 4.62E-03                               | adjusted from (3) |
| CAF                      | 3.00E-03                               | (4)               |

## REFERENCES

1. Critchley J a, Nimmo GR, Gregson C a, Woolhouse NM, Prescott LF. Inter-subject and ethnic differences in paracetamol metabolism. *Br J Clin Pharmacol*. 1986;22(6):649–57.
2. Wishart DS, Knox C, Guo AC, Shrivastava S, Hassanali M, Stothard P, et al. DrugBank: a comprehensive resource for in silico drug discovery and exploration. *Nucleic Acids Res*. 2006 Jan 1;34(Database issue):D668–72.
3. Krauss M, Schaller S, Borchers S, Findeisen R, Lippert J, Kuepfer L. Integrating Cellular Metabolism into a Multiscale Whole-Body Model. Papin JA, editor. *PLoS Comput Biol*. 2012 Oct 25;8(10):e1002750.
4. Tang-Liu DD, Williams RL, Riegelman S. Disposition of caffeine and its metabolites in man. *J Pharmacol Exp Ther*. 1983 Jan;224(1):180–5.
