# Supplementary material for: Multiscale modeling reveals inhibitory and stimulatory effects of caffeine on acetaminophen‐induced toxicity in humans
Source: PubMed Central journal article supplement — CPT Pharmacometrics Syst Pharmacol. 2017 Jan 28;6(2):136–46. doi: 10.1002/psp4.12153 (PMC5321810; doi:10.1002/psp4.12153), 2017-01-28
Supplement: PSP4-6-136-s012.pdf [file PSP4-6-136-s012.pdf]

## Supplementary Table S6. Information about other system biology models for APAP and their application.

|  | **Our study** | **Krauss et al.** (1) | **Jiang et al.** (2) | **Ben-Shachar et al.** (3) | **Woodhead et al.** (4)**,** | **Howell et al.** (5) |
| --- | --- | --- | --- | --- | --- | --- |
| **Modeling Software** | PK-Sim® | PK-Sim® | SimCYP® | Own mathematical model with 21 differential equations | DILISym® | DILISym® |
| **Clinical PK profiles used for model development & validation** | PO data (500 mg, 1000 mg, 2000 mg, 20 mg/kg) (human) | PO data (1000 mg) (human) | IV data (5 mg/kg, 20 mg/kg) (adults)  PO data (975 mg, 1000 mg) (adults)  IV data (12.5 mg/kg, 15 mg/kg, 20 mg/kg) (children) | PO data (20 mg/kg) (human) | Amongst others: IV data (300 mg/kg) (rat)  PO data (300 mg/kg) (rat)  (other data used to calibrate (sub-)models e.g. human urinary excretion of APAP and metabolites, ALT or GSH levels) | Amongst others: IV data (300 mg/kg) (rat)  PO data (300 mg/kg) (rat)  (other data used to calibrate (sub-)models e.g. human urinary excretion of APAP and metabolites, ALT or GSH levels) |
| **Implementation of APAP metabolism & active transport** | APAP metabolism  APAPG: UGT1A9  APAPS: SULT1A1  NAPQI: CYP2E1  APAPC: GSTT1  Active transport  APAP: ABCB1  APAPG: ABCG2  APAPS: ABCG2 | Specific liver clearance processes for APAP, APAPG, APAPS, APAPC | APAP metabolism  APAPG: UGT1A9,A2, UGT2B15  APAPS: SULTs  NAPQI: CYP1A2, CYP2C9,C19,D6,E1, CYP3A4 | APAP metabolism  APAPG: UGT1A1,A6,A9 UGT2B15  APAPS: SULTs  NAPQI: CYP1A2, CYP2E1, CYP3A4  APAPC: GST | Active clearance processes for APAP, APAPG, APAPS, NAPQI | Active clearance processes for APAP, APAPG, APAPS, NAPQI |
| **Modeling application & results** | - Integration of coupled PBPK models of APAP and CAF with in vitro response data  - Investigation of the stimulatory and inhibitory effects of CAF on APAP induced toxicity in humans for co-administration of both drugs | Integration of genome-scale network reconstruction of human hepatocyte into PBPK model of APAP  - Studying APAP-induced toxication at systems level by addressing downstream effects of drug administration on metabolic functionality at cellular scale | - Application of developed PBPK model of APAP for subgroup extrapolations between adults and children by accounting for maturational changes from birth  - PK profiles of neonates, children and adolescents successfully predicted following intravenously and orally administered APAP | - Creation of a mathematical model of APAP and connection to glutathione metabolism to represent APAP pharmacokinetics in humans  - Study extent of liver damage induced by APAP overdose or chronic treatment  - Development of different N-acetyl cysteine (NAC) dosing strategies | - Investigation of optimal NAC treatment after a single APAP overdose for a mean patient and a sample population | - Simulation of temporal profiles of viable liver mass, ALT and GSH levels for different species induced by oral administration of APAP  - Comparison of APAP-induced hepatotoxicity between mice, rats, and humans |

**REFERENCES**

1. Krauss M, Schaller S, Borchers S, Findeisen R, Lippert J, Kuepfer L. Integrating Cellular Metabolism into a Multiscale Whole-Body Model. Papin JA, editor. PLoS Comput Biol. 2012 Oct 25;8(10):e1002750.

2. Jiang X-L, Zhao P, Barrett JS, Lesko LJ, Schmidt S. Application of physiologically based pharmacokinetic modeling to predict acetaminophen metabolism and pharmacokinetics in children. CPT pharmacometrics Syst Pharmacol. 2013;2(August):e80.

3. Ben-Shachar R, Chen Y, Luo S, Hartman C, Reed M, Nijhout HF. The biochemistry of acetaminophen hepatotoxicity and rescue: a mathematical model. Theor Biol Med Model. 2012;9:55.

4. Woodhead JL, Howell BA, Yang Y, Harrill AH, Iii HJC, Andersen ME, et al. An Analysis of N -Acetylcysteine Treatment for Acetaminophen Overdose Using a Systems Model of Drug-Induced Liver Injury □. 2012;

5. Howell BA, Yang Y, Kumar R, Andersen ME, Siler SQ, Watkins PB. In vitro to in vivo extrapolation and species response comparisons for drug-induced liver injury ( DILI ) using DILIsym TM : a mechanistic , mathematical model of DILI. 2012;527–41.
