# Supplementary material for: Multiscale modeling reveals inhibitory and stimulatory effects of caffeine on acetaminophen‐induced toxicity in humans
Source: PubMed Central journal article supplement — CPT Pharmacometrics Syst Pharmacol. 2017 Jan 28;6(2):136–46. doi: 10.1002/psp4.12153 (PMC5321810; doi:10.1002/psp4.12153), 2017-01-28
Supplement: PSP4-6-136-s013.pdf [file PSP4-6-136-s013.pdf]

**Supplementary Table S7. Comparison between observed and predicted PK parameters.**

Comparison between observed (obs.) vs. predicted (pred.) PK parameters for the area under the curve (AUC) and the maximal concentration (Cmax) calculated during PBPK model development and validation. Information about the different studies can be found in Supplementary Table S5.

| Study ID | Drug/ Metabolite | obs. AUC(0-t)<br>[ $\mu\text{mol}/\text{min}/\text{l}$ ] | pred. AUC(0-t)<br>[ $\mu\text{mol}/\text{min}/\text{l}$ ] | obs. Cmax<br>[ $\mu\text{mol}/\text{l}$ ] | pred. Cmax<br>[ $\mu\text{mol}/\text{l}$ ] |
|----------|------------------|----------------------------------------------------------|-----------------------------------------------------------|-------------------------------------------|--------------------------------------------|
| 1        | CAF              | 15352.03                                                 | 18138.13                                                  | 45.45                                     | 63.65                                      |
| 2        | CAF              | 16454.46                                                 | 16948.87                                                  | 42.55                                     | 44.99                                      |
| 3        | CAF              | 8801.67                                                  | 8561.24                                                   | 34.36                                     | 32.94                                      |
| 3        | PX               | 3281.31                                                  | 3064.54                                                   | 8.3                                       | 7.44                                       |
| 3        | TB               | 932.19                                                   | 854.68                                                    | 2.43                                      | 2.1                                        |
| 3        | TP               | 333.45                                                   | 327.64                                                    | 0.97                                      | 0.95                                       |
| 4        | CAF              | 20022.62                                                 | 17521.79                                                  | 84.74                                     | 66.65                                      |
| 4        | PX               | 5910.42                                                  | 6006.03                                                   | 15.41                                     | 14.67                                      |
| 4        | TB               | 1468.9                                                   | 1646.02                                                   | 3.75                                      | 4.09                                       |
| 4        | TP               | 582.09                                                   | 664.45                                                    | 1.61                                      | 1.94                                       |
| 5        | CAF              | 12575.88                                                 | 15209.84                                                  | 23.53                                     | 27.4                                       |
| 5        | PX               | 8055.72                                                  | 8032.27                                                   | 8.62                                      | 7.8                                        |
| 5        | TB               | 727.93                                                   | 2348.92                                                   | 1.64                                      | 2.22                                       |
| 5        | TP               | 255.32                                                   | 389.53                                                    | 0.8                                       | 0.98                                       |
| 6        | CAF              | 38045.37                                                 | 26026.6                                                   | 59.42                                     | 50.46                                      |
| 6        | PX               | 22721.04                                                 | 13927.44                                                  | 18.36                                     | 15.31                                      |
| 6        | TB               | 2008.78                                                  | 4540.18                                                   | 1.59                                      | 4.31                                       |
| 6        | TP               | 2434.37                                                  | 3137.84                                                   | 1.58                                      | 2.07                                       |
| 7        | CAF              | 3136.22                                                  | 2822.1                                                    | 6.41                                      | 5.79                                       |
| 8        | CAF              | 18331.09                                                 | 17405.76                                                  | 34.67                                     | 35.15                                      |
| 9        | CAF              | 38934.18                                                 | 29637.11                                                  | 66.48                                     | 59.05                                      |
| 10       | CAF              | 48814.04                                                 | 45627.33                                                  | 83.73                                     | 89.42                                      |
| 11       | APAP             | 20525.83                                                 | 15740.6                                                   | 114.33                                    | 94.66                                      |
| 11       | APAPG            | 8039.71                                                  | 5894.59                                                   | 30.6                                      | 19.51                                      |
| 11       | APAPS            | 4206.66                                                  | 3004.43                                                   | 15.55                                     | 13.44                                      |
| 11       | APAPC            | 2106.23                                                  | 1744.3                                                    | 7.73                                      | 6.18                                       |
| 12       | APAP             | 26802.18                                                 | 23210.7                                                   | 122.72                                    | 142.35                                     |
| 12       | APAPG            | 12478.09                                                 | 10453.6                                                   | 38.58                                     | 28                                         |
| 12       | APAPS            | 8145.02                                                  | 6386.79                                                   | 26.84                                     | 26.42                                      |
| 13       | APAP             | 4856.58                                                  | 6896.4                                                    | 27.42                                     | 40.66                                      |
| 14       | APAP             | 13396.63                                                 | 14059.81                                                  | 88.1                                      | 84.48                                      |
| 15       | APAP             | 26806.68                                                 | 28897.79                                                  | 131.9                                     | 176.04                                     |
| 16       | APAP             | 17493.32                                                 | 16807.26                                                  | 97.74                                     | 101.09                                     |
| 17       | APAP             | 8674.87                                                  | 20003.71                                                  | 106.85                                    | 114.8                                      |
| 18       | APAP             | 4459.37                                                  | 8709.99                                                   | 22.95                                     | 46.3                                       |
| 19       | APAP             | 6290.79                                                  | 10400.37                                                  | 27.25                                     | 53.63                                      |
