# Supplementary figures and images for: Multiscale modeling reveals inhibitory and stimulatory effects of caffeine on acetaminophen‐induced toxicity in humans
Source: PubMed Central journal article supplement — CPT Pharmacometrics Syst Pharmacol. 2017 Jan 28;6(2):136–46. doi: 10.1002/psp4.12153 (PMC5321810; doi:10.1002/psp4.12153), 2017-01-28

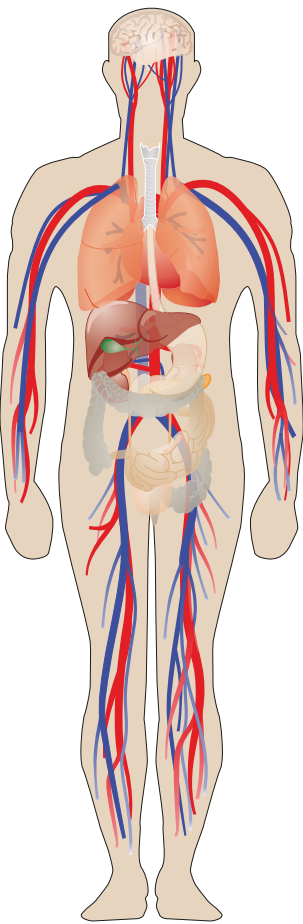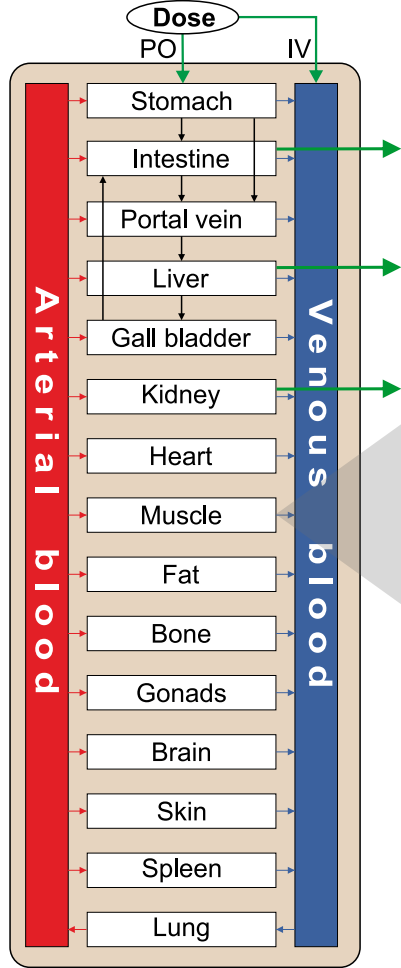

Organ/Tissue

Blood cells

Plasma

Interstitial

Intracellular

Supplement: PSP4-6-136-s003.pdf [file PSP4-6-136-s003.pdf]

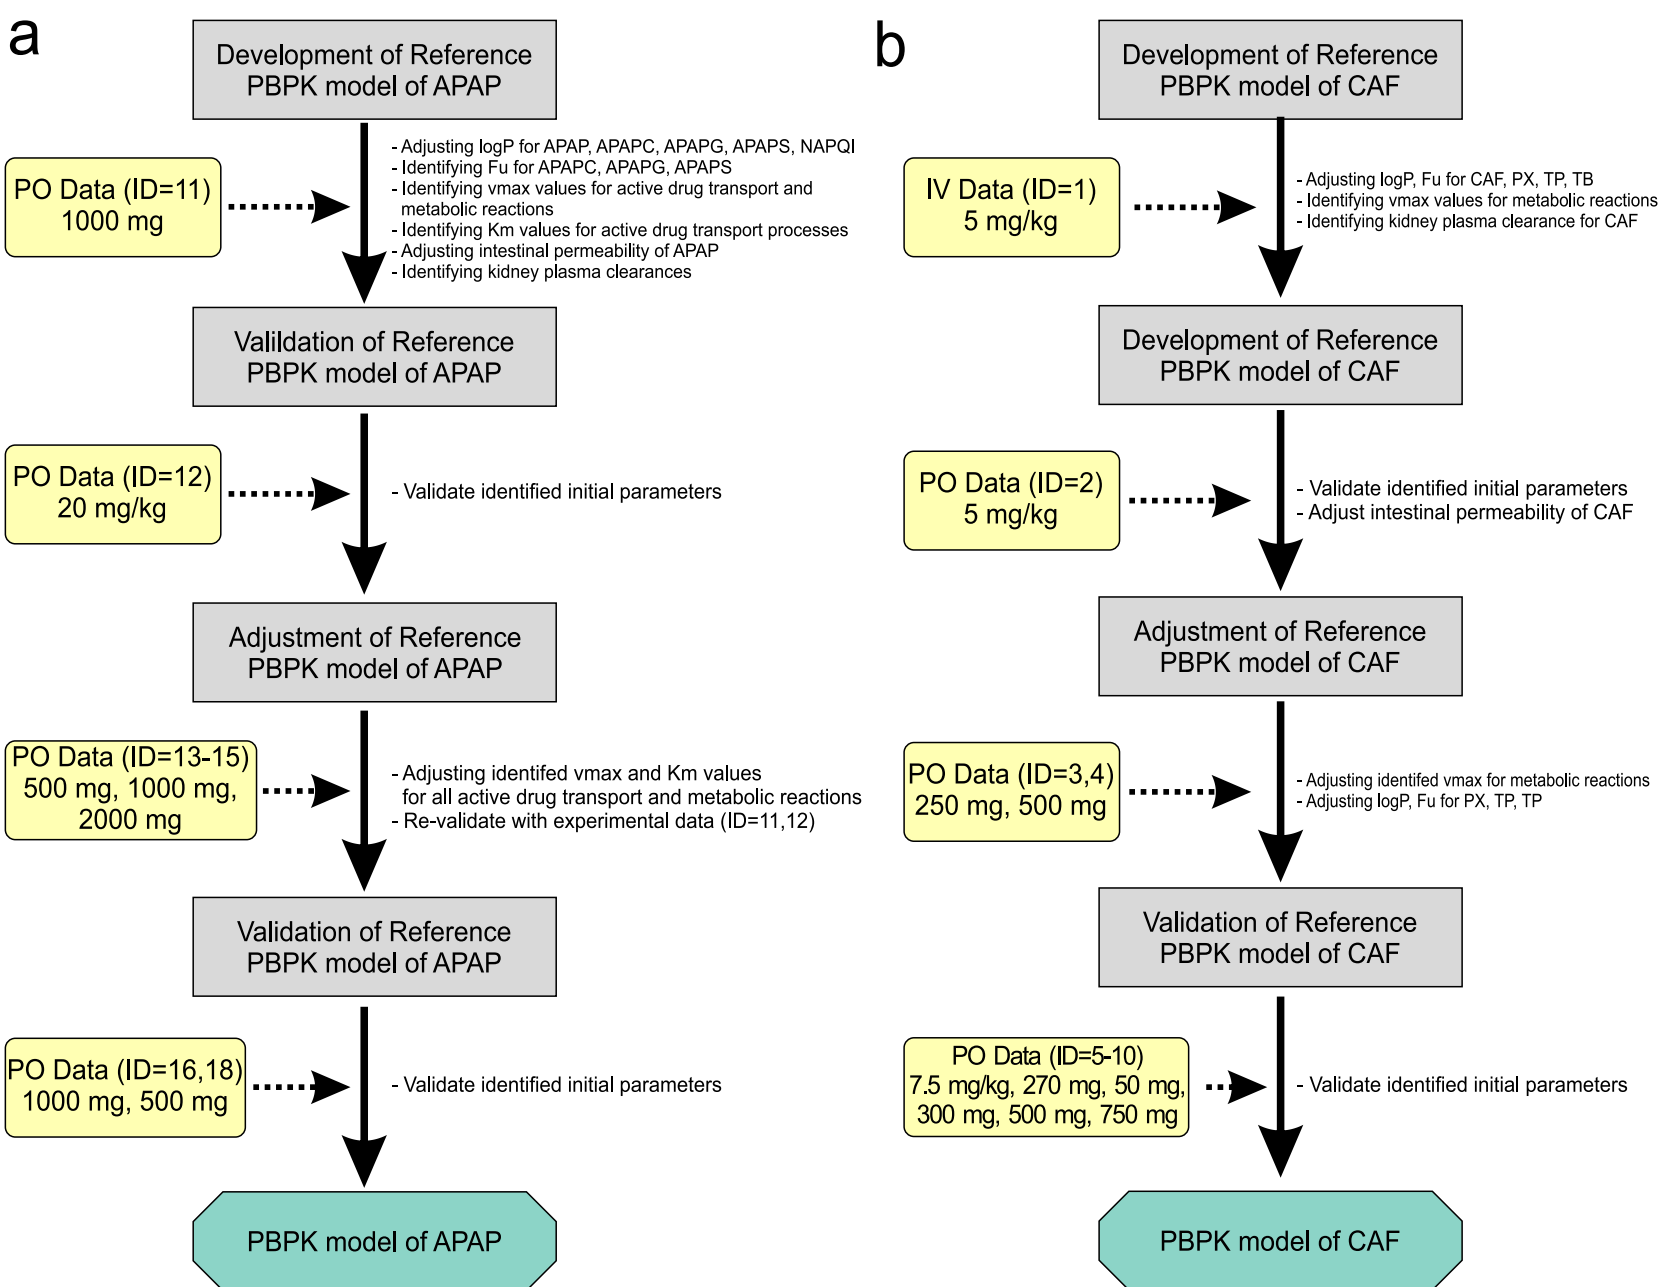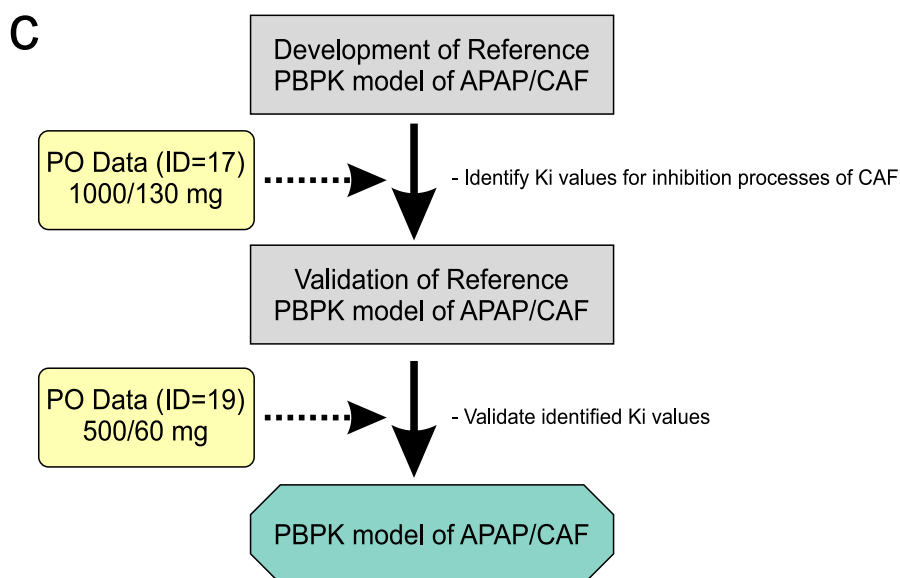

Supplement: PSP4-6-136-s004.pdf [file PSP4-6-136-s004.pdf]

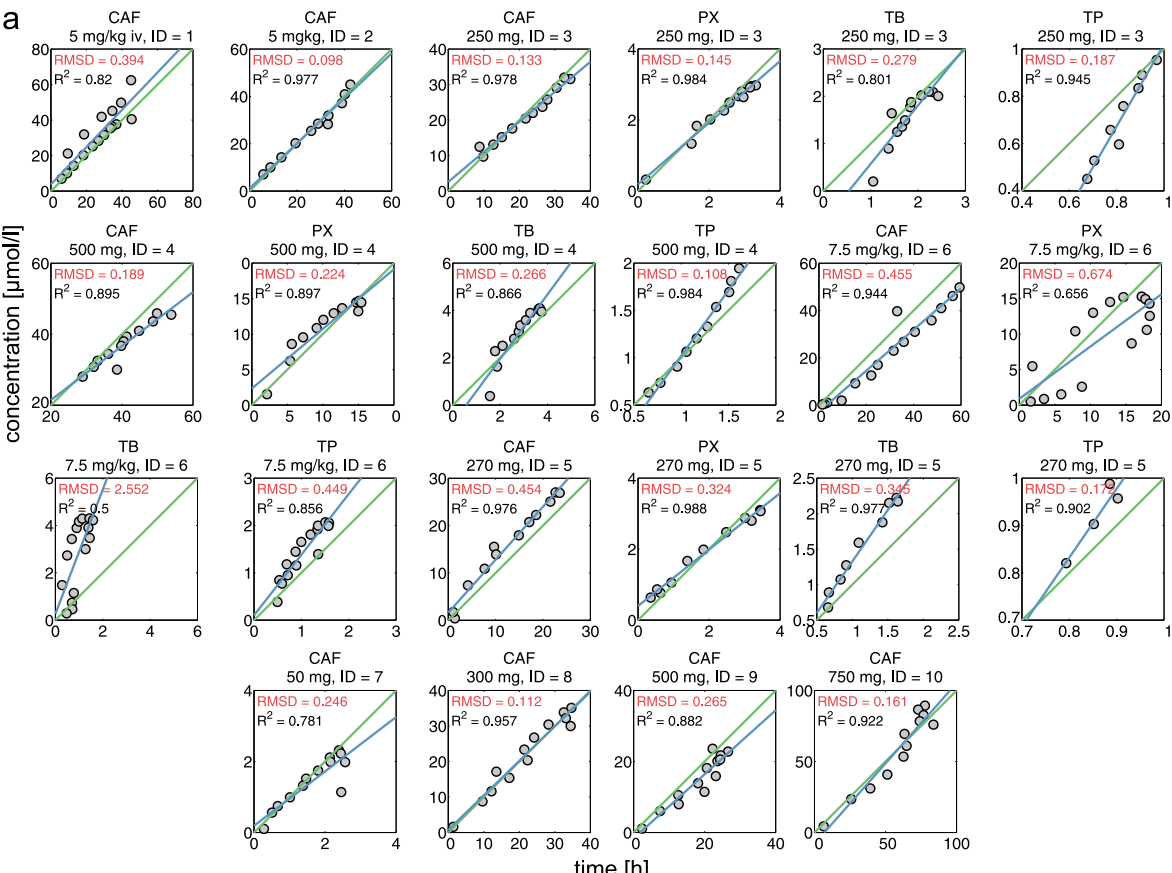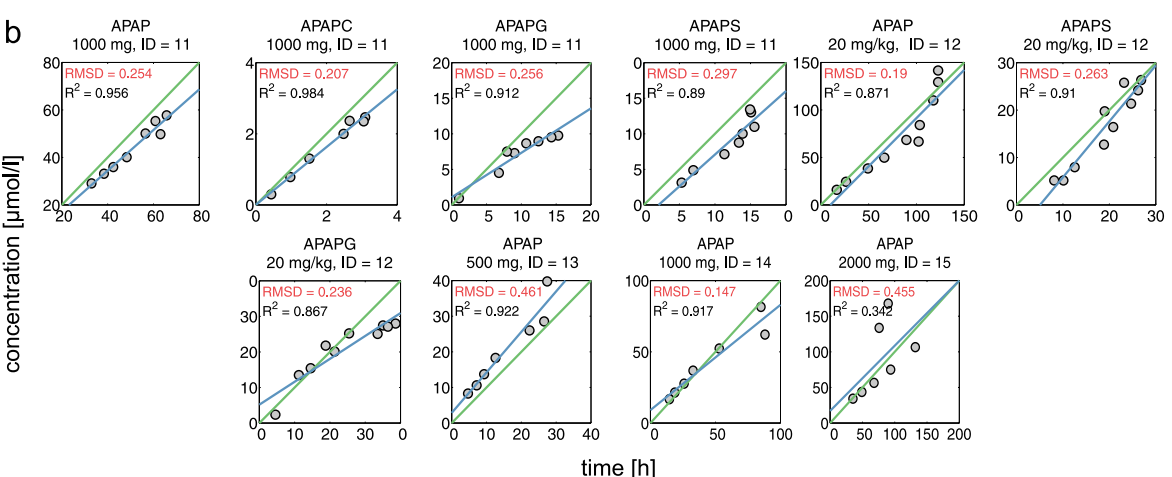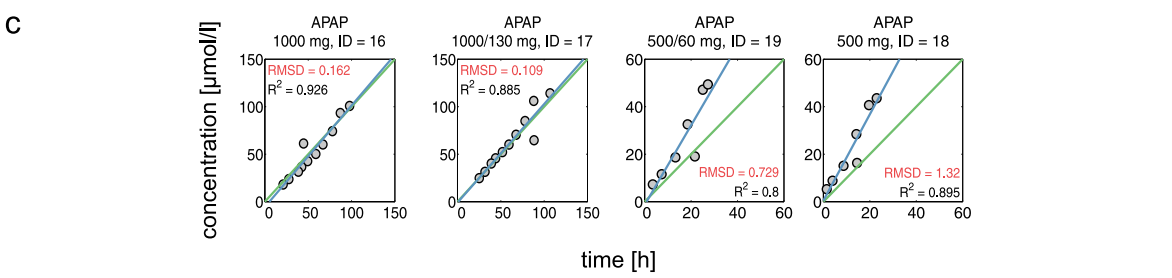

Supplement: PSP4-6-136-s005.pdf [file PSP4-6-136-s005.pdf]

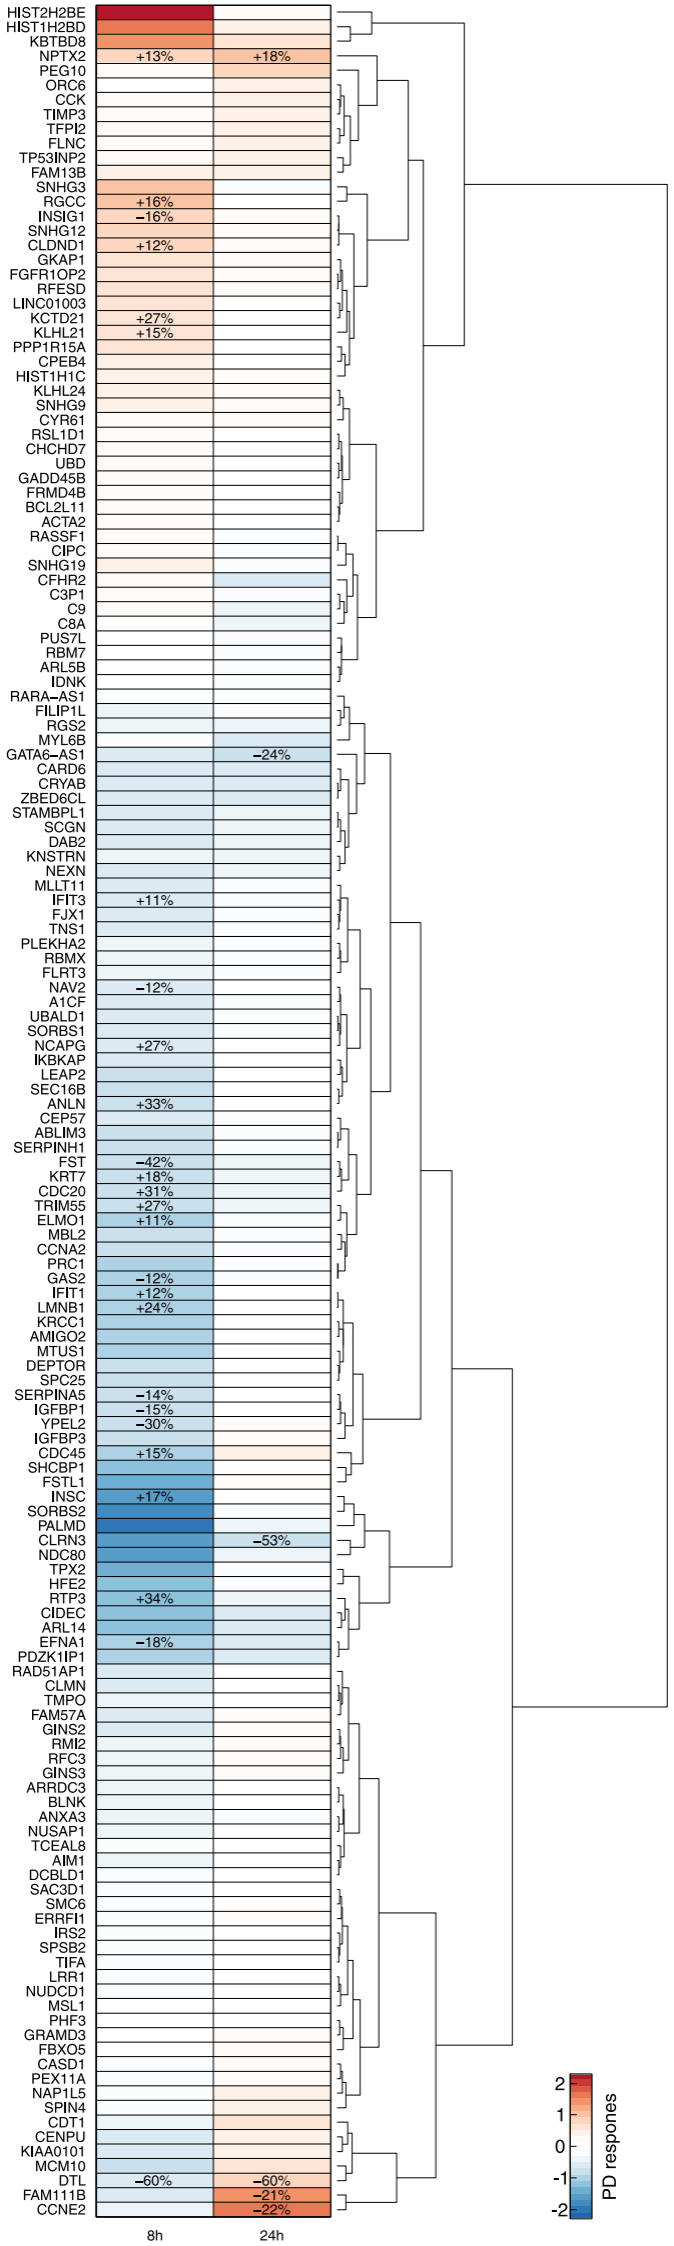

Supplement: PSP4-6-136-s006.pdf [file PSP4-6-136-s006.pdf]
